# Supplementary material for: A Plant Worthy of Further Study—Volatile and Non-Volatile Compounds of Portenschlagiella ramosissima (Port.) Tutin and Its Biological Activity
Source: MDPI journal article supplement (doi:10.3390/ph15121454), 2022-11-23
Supplement: s1 [file s1]

## Supplementary Materials

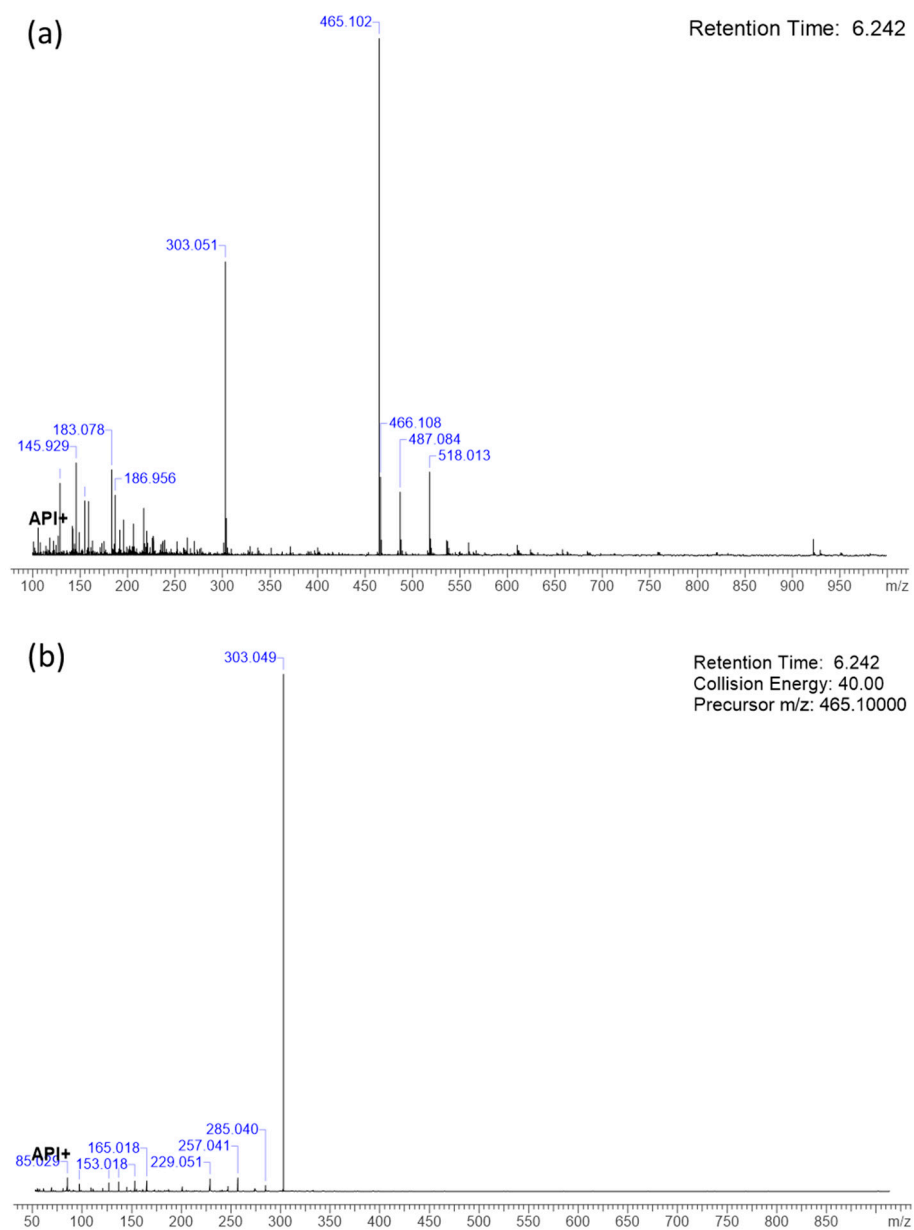

**Figure S1.** UHPLC-ESI(+)-HRMS peak of compound 1, identified as flavonoid glycoside 1 (isoquercitrin/hyperoside/quercetin/spiraeoside): (a) full-scan MS; (b) MS<sup>2</sup> spectrum.

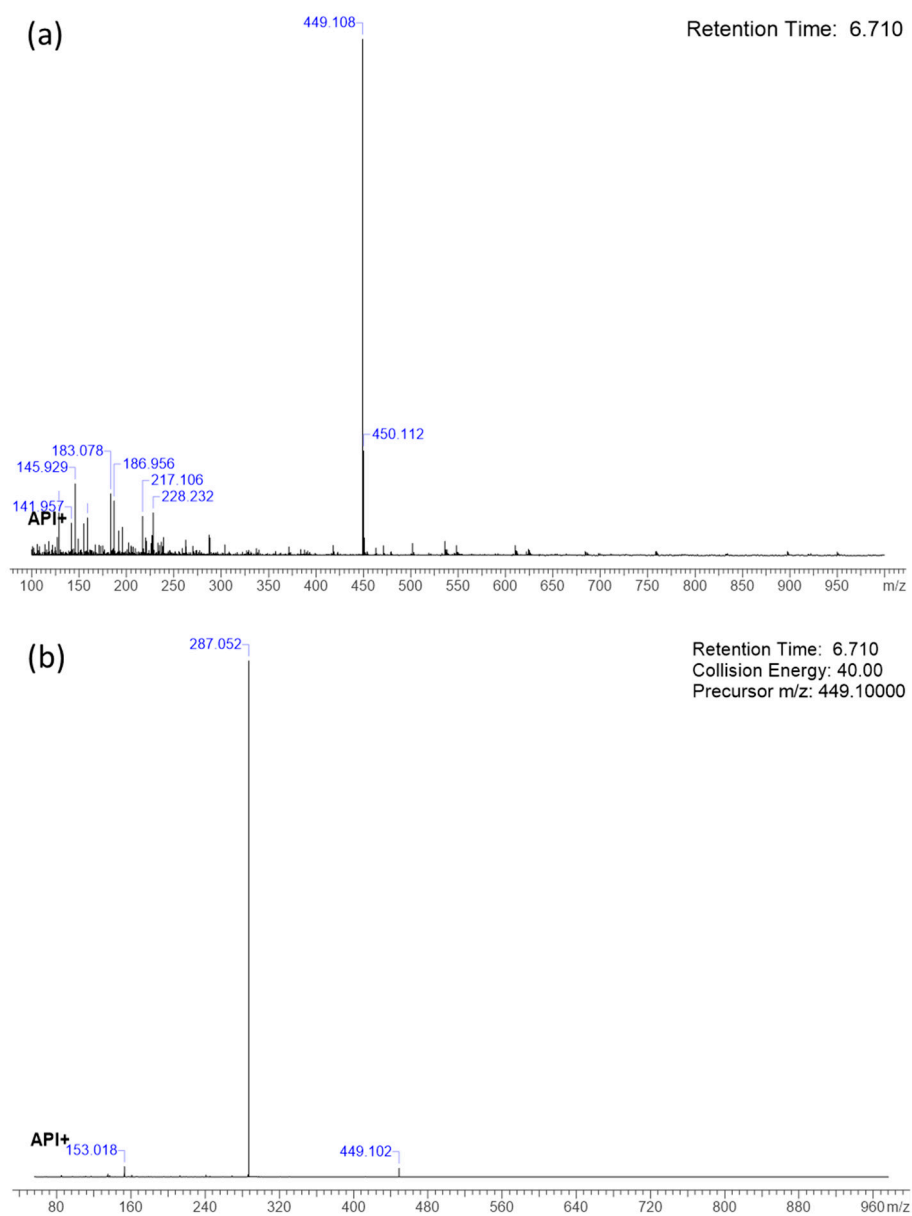

**Figure S2.** UHPLC-ESI(+)-HRMS peak of compound 2, identified as flavonoid glycoside 2 (flavonol O-glycoside): (a) full-scan MS; (b) MS<sup>2</sup> spectrum.

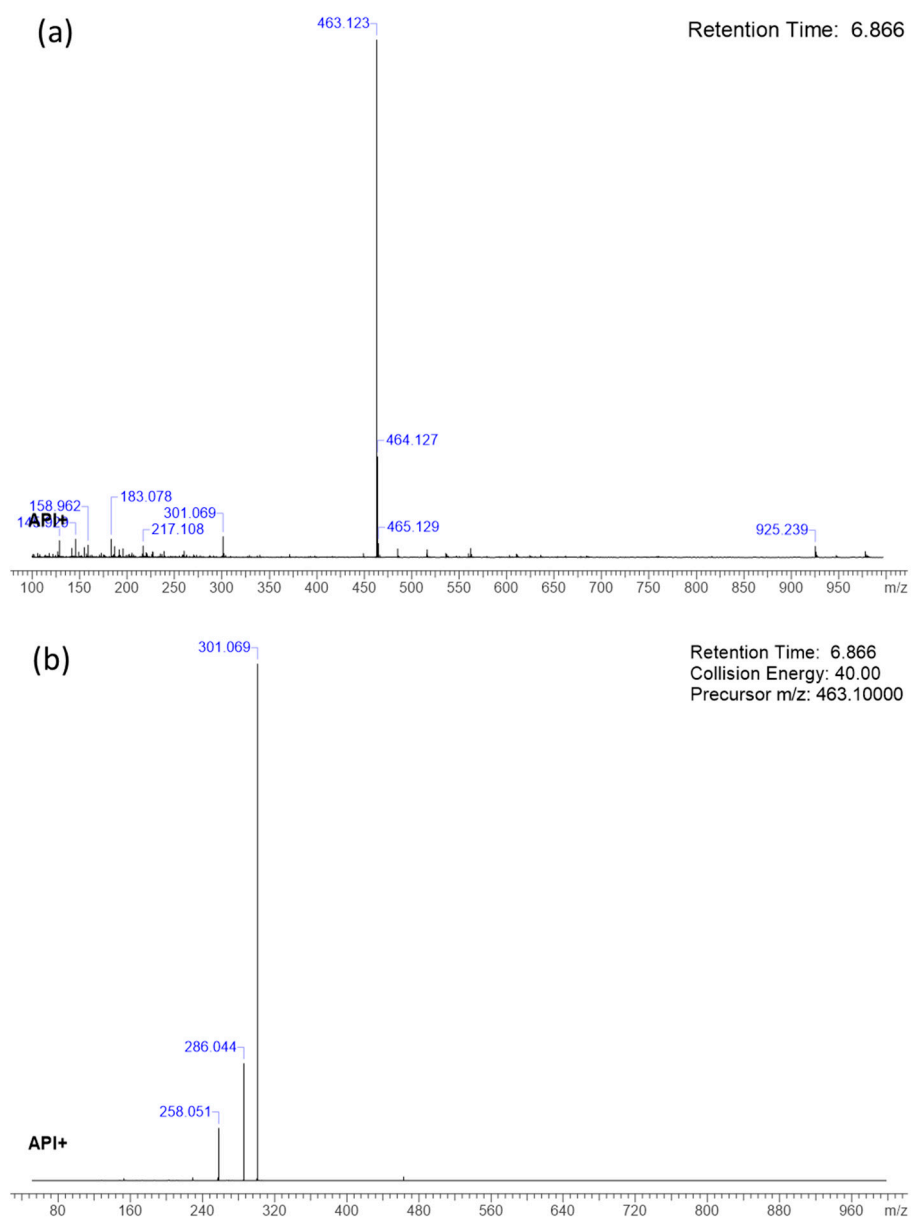

**Figure S3.** UHPLC-ESI(+)-HRMS peak of compound 3, identified as flavonoid glycoside 3 (flavone C-glycoside): (a) full-scan MS; (b) MS<sup>2</sup> spectrum.

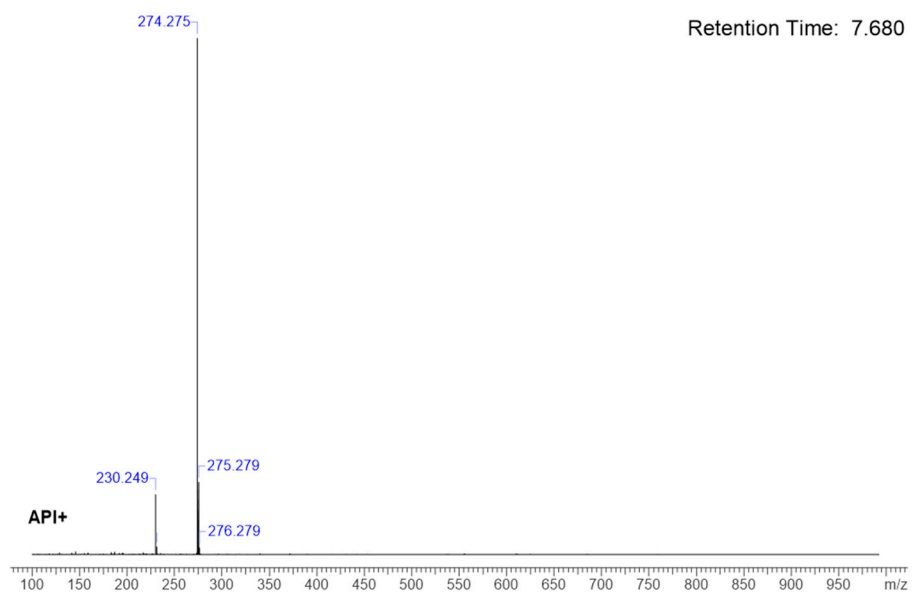

**Figure S4.** UHPLC-ESI(+)-HRMS peak of compound 4, identified as Hexadecasphinganine - full-scan MS.

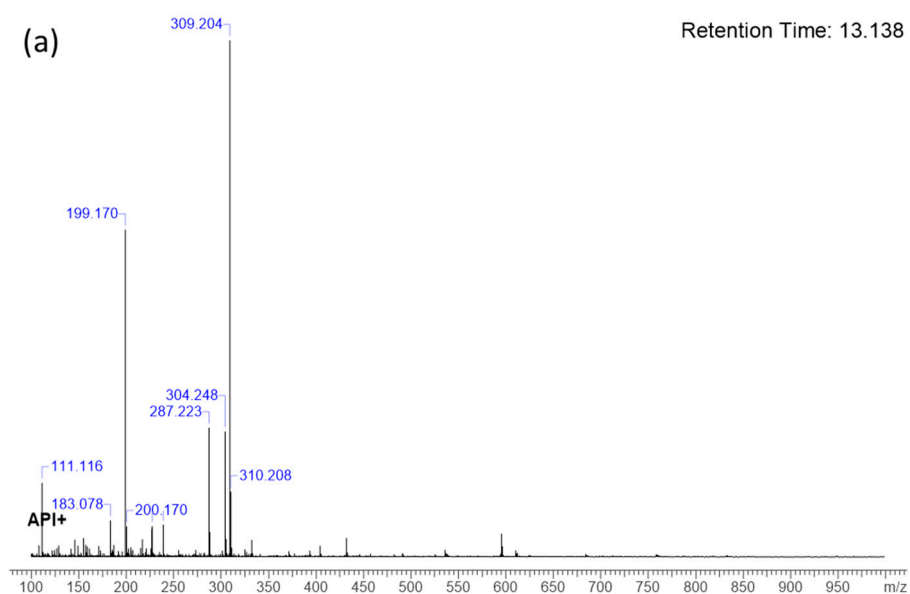

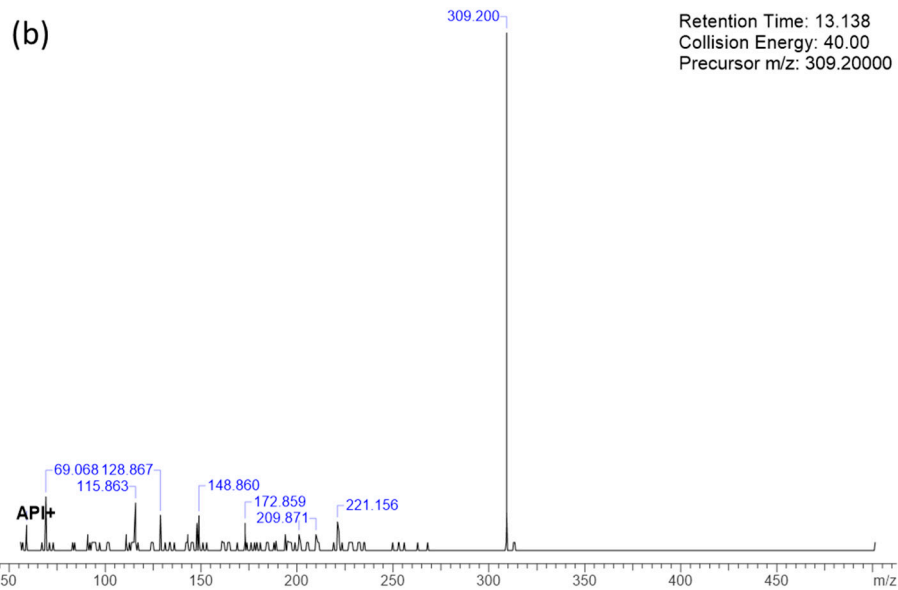

**Figure S5.** UHPLC-ESI(+)-HRMS peak of compound 5, identified as octadecanoid: (a) full-scan MS; (b) MS<sup>2</sup> spectrum.

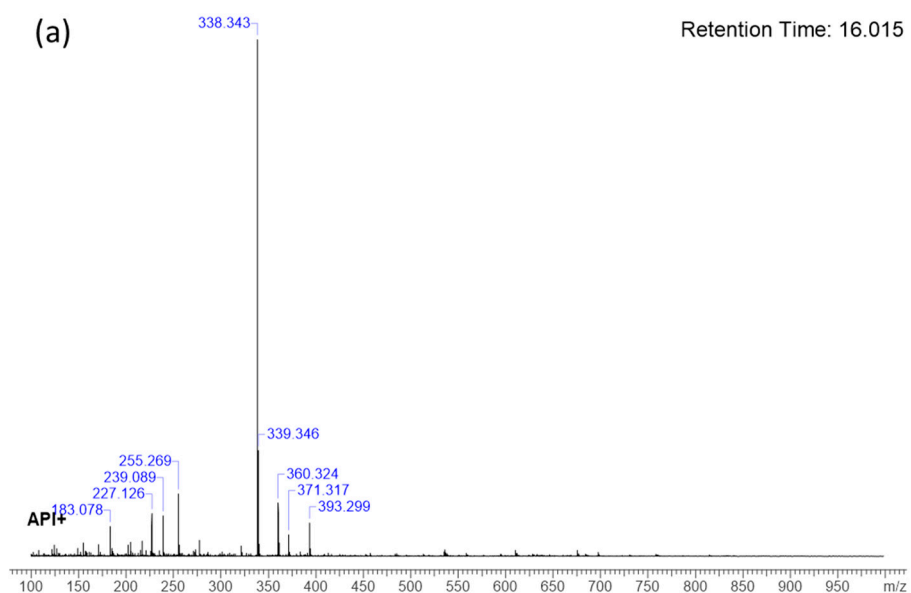

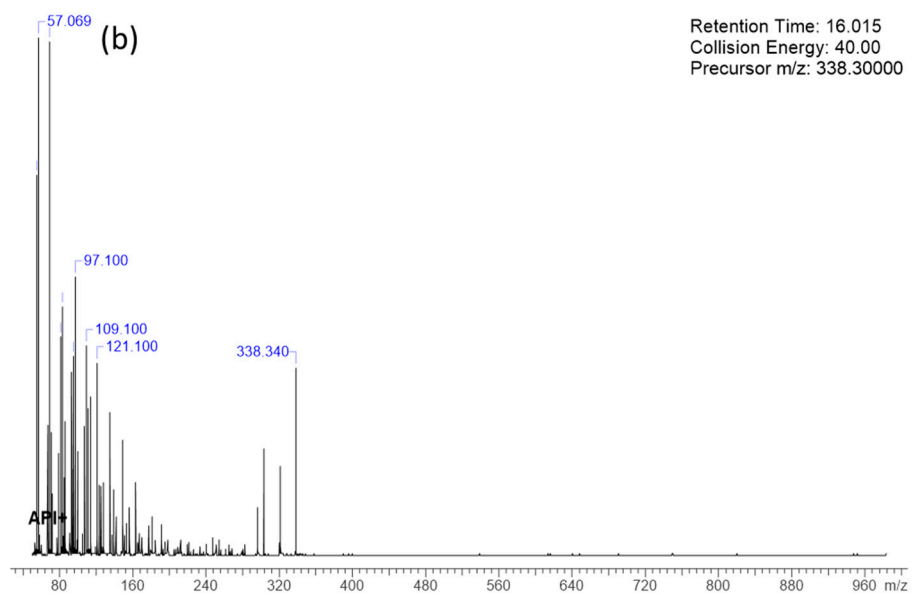

**Figure S6.** UHPLC-ESI(+)-HRMS peak of compound 6, identified as erucamide: (a) full-scan MS; (b) MS<sup>2</sup> spectrum.

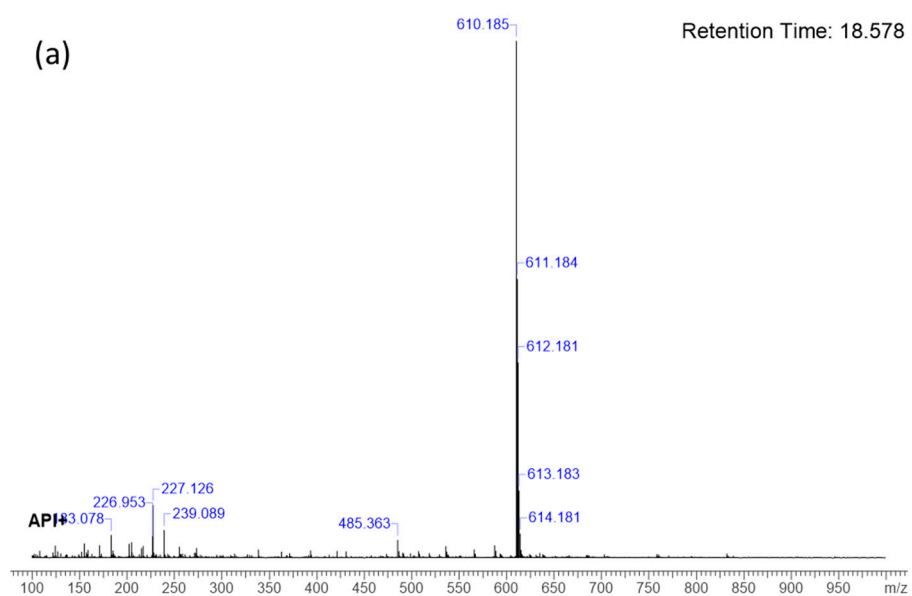

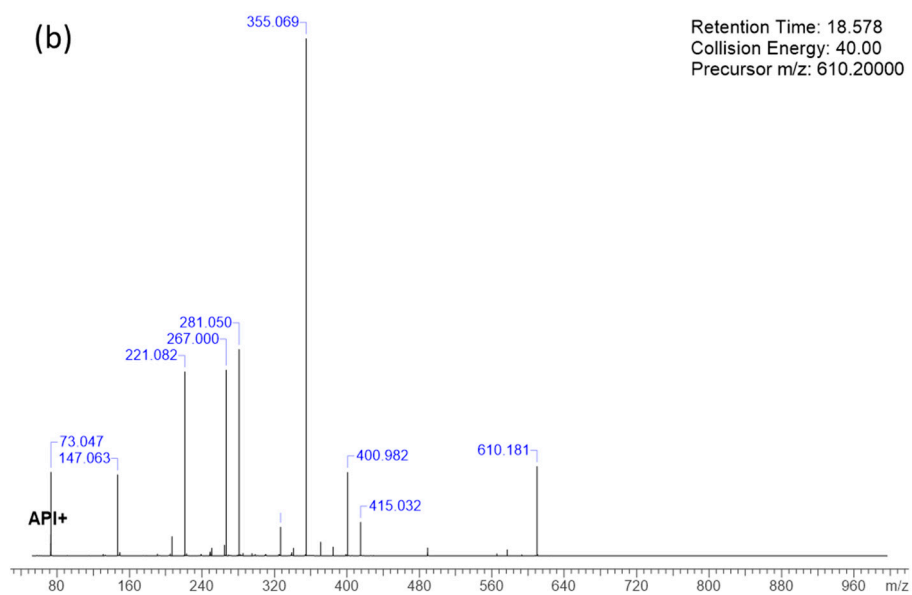

**Figure S7.** UHPLC-ESI(+)-HRMS peak of compound 7, identified as anthocyanidin glycoside (peonidin 3-rutinoside or peonidin 3-rhamnoside 5-glucoside): (a) full-scan MS; (b) MS<sup>2</sup> spectrum.

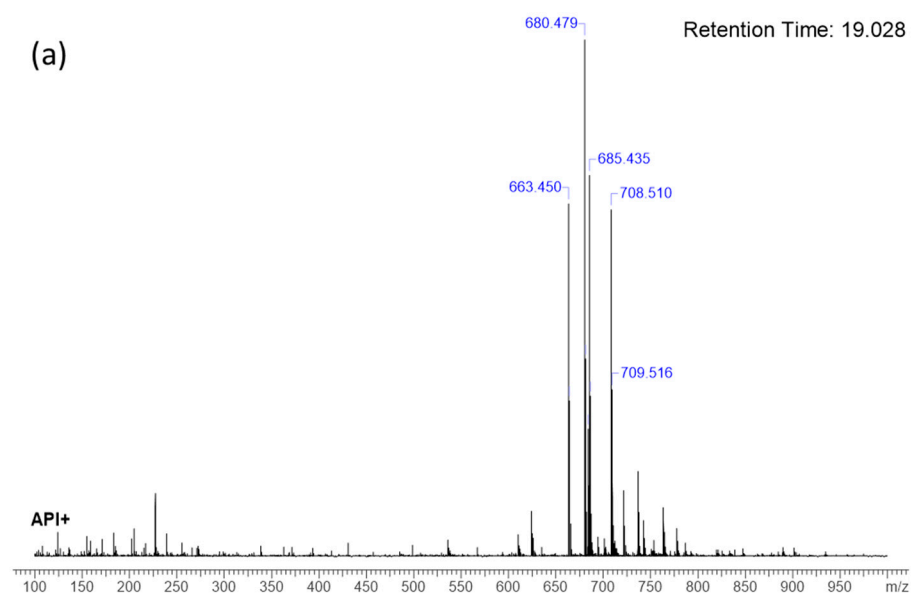

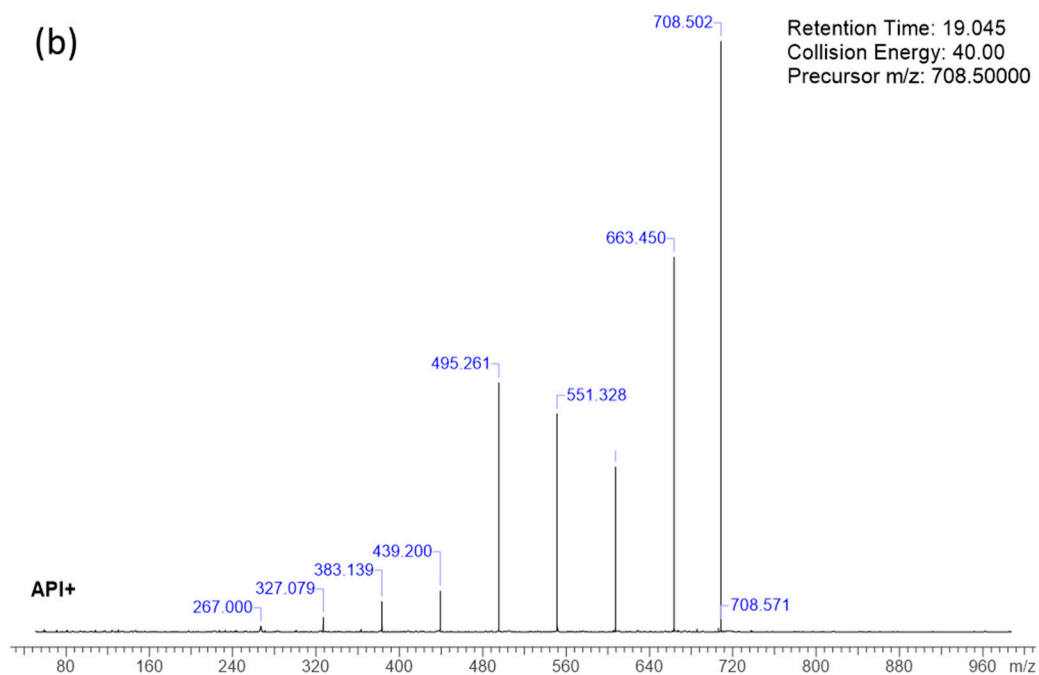

**Figure S8.** UHPLC-ESI(+)-HRMS peak of compound 8, identified as phosphoserine (PS(O-18:0/13:0) or PS(O-16:0/15:0): (a) full-scan MS; (b) MS<sup>2</sup> spectrum.
